# Supplementary material for: Sub-cellular level resolution of common genetic variation in the photoreceptor layer identifies continuum between rare disease and common variation
Source: PubMed Central journal article supplement (PMC9997913; doi:10.1371/journal.pgen.1010587), 2023-02-27

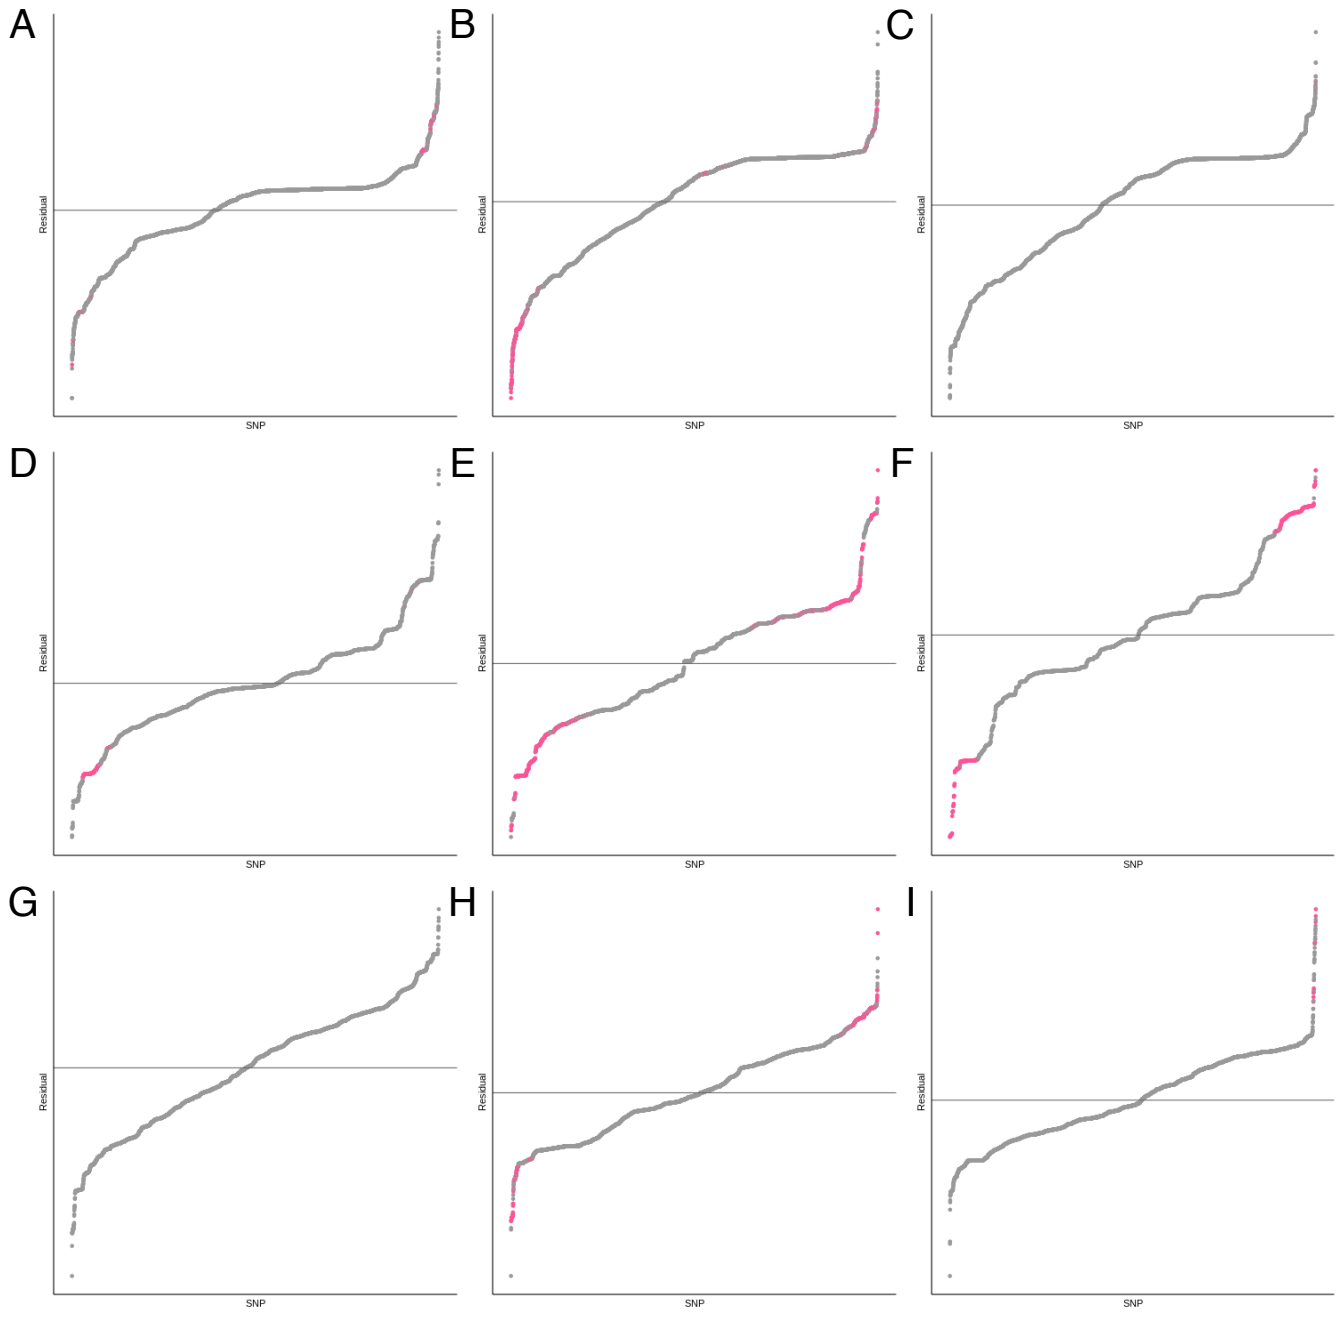

Supplement: pgen.1010587.s003.pdf [file pgen.1010587.s003.pdf]
