# Supplementary material for: Sub-cellular level resolution of common genetic variation in the photoreceptor layer identifies continuum between rare disease and common variation
Source: PubMed Central journal article supplement (PMC9997913; doi:10.1371/journal.pgen.1010587), 2023-02-27
Supplement: pgen.1010587.s006.pdf [file pgen.1010587.s006.pdf]

|                                      | <b>Total OCT Population</b> | <b>Pass filter</b> | <b>Fail filter</b> |
|--------------------------------------|-----------------------------|--------------------|--------------------|
| Height (cm)                          | 168.68 ± 9.25               | 169.43 ± 9.15      | 168.03 ± 9.29      |
| Age (years)                          | 57 ± 8                      | 57 ± 8             | 57 ± 8             |
| Weight (Kg)                          | 78.12 ± 16.02               | 78.47 ± 15.82      | 77.82 ± 16.17      |
| Sex (m/f)                            | 29,713/34,929               | 14,696/16,439      | 15,017/18,490      |
| Refractive Error Left<br>(Dioptres)  | -0.32 ± 2.73                | 0.23 ± 1.49        | -0.80 ± 3.41       |
| Refractive Error Right<br>(Dioptres) | -0.38±2.73                  | 0.18 ± 1.48        | -0.87 ± 3.40       |
| ONL thickness                        | 79.79 ±9.03                 | 80.75 ± 6.44       | 78.89 ± 10.84      |
| IS thickness                         | 24.10 ± 2.97                | 23.60 ± 1.67       | 24.58 ± 3.75       |
| OS thickness                         | 37.22 ± 5.65                | 38.04 ± 3.90       | 36.44 ± 6.81       |
