# Supplementary material for: Sub-cellular level resolution of common genetic variation in the photoreceptor layer identifies continuum between rare disease and common variation
Source: PubMed Central journal article supplement (PMC9997913; doi:10.1371/journal.pgen.1010587), 2023-02-27
Supplement: pgen.1010587.s007.pdf [file pgen.1010587.s007.pdf]

| <b>GWAS phenotype</b> | <b>lambda GC</b> | <b>LDSC intercept</b> | <b>LDSC ratio</b> |
|-----------------------|------------------|-----------------------|-------------------|
| ONL                   | 1.15             | 1.04                  | 0.13              |
| IS                    | 1.07             | 1                     | <0                |
| OS                    | 1.09             | 1.02                  | 0.15              |
