# Supplementary material for: Sub-cellular level resolution of common genetic variation in the photoreceptor layer identifies continuum between rare disease and common variation
Source: PubMed Central journal article supplement (PMC9997913; doi:10.1371/journal.pgen.1010587), 2023-02-27
Supplement: pgen.1010587.s008.pdf [file pgen.1010587.s008.pdf]

| SNP           | Chr | P-value  | Associated Gene  | Ocular Phenotypes                            | Non-ocular Phenotypes                                                                                                          |
|---------------|-----|----------|------------------|----------------------------------------------|--------------------------------------------------------------------------------------------------------------------------------|
| rs112248193   | 1   | 2.73E-09 | <i>LRRC47</i>    |                                              | High light scatter reticulocyte count                                                                                          |
| rs2128416     | 1   | 4.83E-13 | <i>CASZ1</i>     |                                              | Amlodipine, High blood pressure, Hypertension                                                                                  |
| rs11587687    | 1   | 5.02E-09 | <i>GNAT2</i>     |                                              | Frequency of tiredness/lethargy                                                                                                |
| rs3790612     | 1   | 2.60E-15 | <i>ST7L</i>      |                                              | Blood pressure, High blood pressure, Platelet distribution width                                                               |
| rs72683442    | 1   | 4.13E-21 | <i>SLC16A1</i>   | Spherical power                              | Birth weight                                                                                                                   |
| rs410895      | 1   | 8.19E-22 | <i>CFHR2</i>     | Macular degeneration                         |                                                                                                                                |
| rs6427827     | 1   | 2.50E-16 | <i>ZNF281</i>    | Age started wearing glasses, Spherical power | Urinary albumin excretion                                                                                                      |
| rs11577827 *  | 1   | 2.77E-13 | <i>KDM5B</i>     |                                              |                                                                                                                                |
| rs919655      | 1   | 2.36E-09 | <i>PROX1-AS1</i> |                                              | Mean sphered cell volume, Oily fish intake                                                                                     |
| rs12140498    | 1   | 3.14E-09 | <i>LINC02257</i> |                                              | Arm fat percentage, Colon cancer                                                                                               |
| rs6426584     | 1   | 7.03E-11 | <i>CDC42BPA</i>  |                                              | Impedance of arms, Neutrophil traits                                                                                           |
| rs7594221     | 2   | 1.07E-14 | <i>ATAD2B</i>    |                                              | Forced vital capacity, Height, Intelligence, Lymphocyte volume, Mean sphered cell volume, Platelet traits, Reticulocyte traits |
| rs116350483   | 2   | 2.10E-26 | <i>LINC01412</i> |                                              | Particulate matter air pollution                                                                                               |
| rs80265589    | 2   | 1.86E-13 | <i>STK39</i>     |                                              | Impedance of arm                                                                                                               |
| rs28416292 *  | 2   | 1.78E-08 | <i>CERKL</i>     |                                              |                                                                                                                                |
| rs58172089    | 2   | 2.74E-08 | <i>PLCLI</i>     |                                              | Arm fat, Body mass index, Impedance of body                                                                                    |
| rs3755152 *   | 2   | 4.39E-10 | <i>MREG</i>      |                                              |                                                                                                                                |
| rs148388367 * | 2   | 1.20E-21 | <i>MREG</i>      |                                              |                                                                                                                                |
| rs201030469   | 2   | 6.58E-09 | <i>TNSI</i>      |                                              | Breast cancer                                                                                                                  |

|               |   |          |                  |                                                                          |                                                                                                             |
|---------------|---|----------|------------------|--------------------------------------------------------------------------|-------------------------------------------------------------------------------------------------------------|
| rs7564805     | 2 | 6.16E-29 | <i>SAG</i>       |                                                                          | Crohn's disease,<br>Inflammatory Bowel Disease                                                              |
| rs34234056 *  | 3 | 2.37E-08 | <i>LINC01267</i> |                                                                          |                                                                                                             |
| rs11129176    | 3 | 1.53E-08 | <i>RARB</i>      | Optic disc area                                                          | Height, Red blood<br>cell count                                                                             |
| rs6775323 *   | 3 | 5.79E-15 | <i>LINC02084</i> |                                                                          |                                                                                                             |
| rs62282867    | 3 | 4.63E-19 | <i>IMPG2</i>     |                                                                          | Heel bone mineral density                                                                                   |
| rs111163508 * | 3 | 2.28E-20 | <i>RHO</i>       |                                                                          |                                                                                                             |
| rs7430585     | 3 | 1.26E-10 | <i>TSC22D2</i>   | Age started wearing<br>glasses                                           |                                                                                                             |
| rs115237855 * | 5 | 3.73E-12 | <i>BASPI-ASI</i> |                                                                          |                                                                                                             |
| rs78303234 *  | 5 | 3.32E-08 | <i>BASPI</i>     |                                                                          |                                                                                                             |
| rs30373       | 5 | 7.70E-10 | <i>LINC01948</i> | Macular thickness                                                        |                                                                                                             |
| rs63338061    | 5 | 9.81E-11 | <i>MAP1B</i>     | Age started wearing<br>glasses                                           |                                                                                                             |
| rs17421627    | 5 | 3.30E-33 | <i>LINC00461</i> | Macular thickness, Retinal<br>vascular calliber                          | Comparative height at<br>age 10, Seen doctor for nerves,<br>anxiety, tension or depression                  |
| rs62391700    | 5 | 5.05E-13 | <i>LMNB1-DT</i>  |                                                                          | Height, Multiple myeloma                                                                                    |
| rs1109114     | 5 | 2.65E-13 | <i>AFAP1L1</i>   |                                                                          | Body mass index,<br>Forced expiratory volume,<br>High blood pressure, Hearing<br>difficulties, Hypertension |
| rs1438692     | 5 | 1.32E-11 | <i>AFAP1L1</i>   |                                                                          | Forced expiratory volume                                                                                    |
| rs6875105     | 5 | 1.39E-13 | <i>BOD1</i>      | Refractive error                                                         |                                                                                                             |
| rs2326838     | 6 | 7.86E-13 | <i>RREB1</i>     | Age started wearing<br>glasses, Spherical equivalent,<br>Spherical power | Lymphocyte traits,<br>White blood cell count                                                                |
| rs12192672    | 6 | 8.88E-10 | <i>RREB1</i>     |                                                                          | Haemoglobin traits,<br>Hair/balding pattern,<br>Height, Red blood cell<br>traits                            |
| rs17507554    | 6 | 3.93E-09 | <i>NEDD9</i>     | Macular thickness                                                        |                                                                                                             |

|              |   |          |                  |                                                                                  |                                                                                                                                                                                        |
|--------------|---|----------|------------------|----------------------------------------------------------------------------------|----------------------------------------------------------------------------------------------------------------------------------------------------------------------------------------|
| rs6923949    | 6 | 4.22E-09 | <i>TULP1</i>     |                                                                                  | Ankle spacing width,<br>Anthropometric traits,<br>Basal metabolic rates,<br>Forced expiratory volume,<br>White blood cell count                                                        |
| rs375435     | 6 | 3.56E-16 | <i>PRPH2</i>     |                                                                                  | Neutrophil percentage                                                                                                                                                                  |
| rs6910414    | 6 | 1.87E-10 | <i>DST-ASI</i>   |                                                                                  | Haemoglobin concentration,<br>Red blood cell count                                                                                                                                     |
| rs947340 *   | 6 | 1.17E-13 | <i>IMPG1</i>     |                                                                                  |                                                                                                                                                                                        |
| rs74526772   | 6 | 1.13E-19 | <i>ATG5</i>      |                                                                                  | Asthma                                                                                                                                                                                 |
| rs9639276    | 7 | 4.74E-10 | <i>SUN1</i>      |                                                                                  | Body mass index, Forced<br>expiratory volume, Impedance<br>of body                                                                                                                     |
| rs12531825   | 7 | 5.94E-09 | <i>GLCC11-DT</i> |                                                                                  | Average total household<br>income, Educational attainment,<br>Forced expiratory volume,<br>Height, Leg fat, Time<br>spent watching TV                                                  |
| rs12719025   | 7 | 6.39E-22 | <i>COBL</i>      | Macular thickness,<br>Refractive error, Spherical power,<br>Strong/weak meridian |                                                                                                                                                                                        |
| rs111963714  | 7 | 5.96E-13 | <i>PILRB</i>     |                                                                                  | Platelet traits                                                                                                                                                                        |
| rs34926272 * | 7 | 2.03E-11 | <i>UBE2H</i>     |                                                                                  |                                                                                                                                                                                        |
| rs62490856   | 8 | 5.02E-13 | <i>RP1L1</i>     | Ocual macular dystrophy,<br>Strong meridian                                      | Body mass index,<br>Forced expiratory volume,<br>Heel bone mineral density,<br>Myeloid white blood cell count,<br>Platelet distribution width,<br>Red blood cell distribution<br>width |
| rs61675430   | 8 | 1.30E-10 | <i>CHD7</i>      |                                                                                  | Lymphocyte traits, Neutrophil<br>traits, Potassium in urine                                                                                                                            |
| rs13263941   | 8 | 2.07E-50 | <i>RSPO2</i>     | Strong/weak meridian                                                             | Coffee intake, Hair colour                                                                                                                                                             |
| rs376067714  | 8 | 2.73E-24 | <i>RSPO2</i>     |                                                                                  |                                                                                                                                                                                        |
| rs9298817    | 9 | 2.90E-22 | <i>MIR31HG</i>   | Strong meridian                                                                  | Hypothyroidism                                                                                                                                                                         |

|              |    |          |                 |                                                                                                                |                                                                                                                  |
|--------------|----|----------|-----------------|----------------------------------------------------------------------------------------------------------------|------------------------------------------------------------------------------------------------------------------|
| rs10781177   | 9  | 1.49E-08 | <i>RORB</i>     | Age started wearing glasses, Spherical power                                                                   |                                                                                                                  |
| rs717299     | 9  | 3.80E-13 | <i>RORB</i>     |                                                                                                                | Impedance of arm                                                                                                 |
| rs111245635  | 10 | 8.41E-10 | <i>RBP3</i>     | Age started wearing glasses, Retinitis pigmentosa, Strong/weak meridian                                        | Soya milk                                                                                                        |
| rs1947075    | 10 | 7.86E-10 | <i>ARHGAP22</i> | Macular thickness                                                                                              |                                                                                                                  |
| rs7916697    | 10 | 3.80E-13 | <i>ATOH7</i>    | Cup-disc ratio, Optic cup area, Optic disc area, Optic disc radius                                             | Anthropometric traits, Basal metabolic rate, Forced expiratory volume, Gastro-oesophageal reflux                 |
| rs11200922   | 10 | 1.62E-26 | <i>CDHR1</i>    | Age started wearing glasses, Hypermetropia, Spherical power                                                    |                                                                                                                  |
| rs34309160 * | 10 | 3.34E-08 | <i>GBF1</i>     |                                                                                                                |                                                                                                                  |
| rs17102399   | 10 | 2.44E-08 | <i>FGFR2</i>    |                                                                                                                | Breast cancer                                                                                                    |
| rs60401382   | 10 | 2.43E-16 | <i>HTRA1</i>    | Macular degeneration, Other retinal disorders                                                                  | Anthropometric traits, Basal metabolic rate, Intelligence, Stroke                                                |
| rs1016934    | 11 | 2.18E-12 | <i>ELP4</i>     | Strong meridian                                                                                                | Processed meat intake                                                                                            |
| rs618838     | 11 | 1.79E-09 | <i>ACTN3</i>    |                                                                                                                | Anthropometric traits, Impedance of body, Overall health rating, Red blood cell traits                           |
| rs116233906  | 11 | 9.33E-14 | <i>SMIM38</i>   |                                                                                                                | Heel bone mineral density                                                                                        |
| rs10737153   | 11 | 3.18E-09 | <i>MYEOV</i>    |                                                                                                                | Body mass, Breast cancer, Impedance of leg                                                                       |
| rs12574286   | 11 | 5.77E-15 | <i>GDPD4</i>    |                                                                                                                | Hypertrophy of salivary gland, Platelet distribution width                                                       |
| rs1126809    | 11 | 2.56E-22 | <i>TYR</i>      | Eye colour, Foveal hypoplasia, Intraocular pressure, Ocular albinism, Oculocutaneous albinism, Optic disc size | Breast cancer, Hair colour, Hearing difficulties, Number of cancers, Skin cancer, Skin colour, Sunburn, Vitiligo |
| rs6483429    | 11 | 2.67E-09 | <i>SESN3</i>    |                                                                                                                | Hair/balding pattern                                                                                             |

|               |    |           |                  |                                                                                                                                   |                                                                                                                                                                   |
|---------------|----|-----------|------------------|-----------------------------------------------------------------------------------------------------------------------------------|-------------------------------------------------------------------------------------------------------------------------------------------------------------------|
| rs2080402     | 12 | 2.21E-12  | <i>SLC6A13</i>   | Age started wearing glasses                                                                                                       | Comparative size at age 10, Lifetime number of sexual partners                                                                                                    |
| rs3138142     | 12 | 5.58E-60  | <i>RDH5</i>      | Age started wearing glasses, Cataract, Macular thickness, Myopia, Pigmentary retinal dystrophy, Refractive error, Spherical power | Atrial fibrillation                                                                                                                                               |
| rs76629482 *  | 12 | 3.38E-16  | <i>NTN4</i>      |                                                                                                                                   |                                                                                                                                                                   |
| rs9796234 *   | 13 | 4.69E-18  | <i>GRK1</i>      |                                                                                                                                   |                                                                                                                                                                   |
| rs28468687 *  | 14 | 1.02E-08  | <i>RALGAP1</i>   |                                                                                                                                   |                                                                                                                                                                   |
| rs1254260     | 14 | 1.18E-09  | <i>LINC02322</i> | Age started wearing glasses, Glaucoma, Spherical power                                                                            | Anthropometric traits, Basal metabolic rate, Forced expiratory volume, Heel bone mineral density, Impedance of legs, Menarche                                     |
| rs1956524     | 14 | 2.13E-08  | <i>RAD51B</i>    |                                                                                                                                   | Asthma, Hand grip strength, Hayfever, allergic rhinitis or eczema, Male-pattern balding                                                                           |
| rs10135971    | 14 | 4.47E-16  | <i>ACTN1-AS1</i> | Macular degeneration, Spherical power                                                                                             | Exercises (swimming, cycling, keep fit, bowling), Forced vital capacity, Haematocrit percentage, Leg mass, Platelet traits, Pulse rate, Sensitivity/hurt feelings |
| rs112145470 * | 14 | 4.81E-16  | <i>ZNF410</i>    |                                                                                                                                   |                                                                                                                                                                   |
| rs368205955   | 14 | 4.13E-46  | <i>BBOF1</i>     |                                                                                                                                   | Red cell distribution width                                                                                                                                       |
| rs12147951 *  | 14 | 8.89E-112 | <i>VSX2</i>      |                                                                                                                                   |                                                                                                                                                                   |
| rs1972565 *   | 14 | 5.23E-191 | <i>VSX2</i>      |                                                                                                                                   |                                                                                                                                                                   |
| rs1972564 *   | 14 | 2.93E-74  | <i>VSX2</i>      |                                                                                                                                   |                                                                                                                                                                   |
| rs118186707 * | 14 | 1.70E-32  | <i>VSX2</i>      |                                                                                                                                   |                                                                                                                                                                   |
| rs28488340 *  | 14 | 9.02E-31  | <i>VSX2</i>      |                                                                                                                                   |                                                                                                                                                                   |

|             |    |          |                        |                                                                                                                                                                                          |                                                                                                                                                                                                                                                                                                                                                                                                      |
|-------------|----|----------|------------------------|------------------------------------------------------------------------------------------------------------------------------------------------------------------------------------------|------------------------------------------------------------------------------------------------------------------------------------------------------------------------------------------------------------------------------------------------------------------------------------------------------------------------------------------------------------------------------------------------------|
| rs888413    | 14 | 1.92E-14 | <i>YLPM1</i>           |                                                                                                                                                                                          | Body fat percentage, Depression, Fed-up feelings, Guilty feelings, Monocyte count, Mood swings, Nervous feelings, Neuroticism, Platelet count, Worrier/anxious feelings                                                                                                                                                                                                                              |
| rs1800407   | 15 | 7.58E-25 | <i>OCA2</i>            | Age started wearing glasses, Cataract, Central retinal arteriolar equivalent, Central retinal vein equivalent, Cylindrical power, Eye colour, Macular thickness, Oculocutaneous albinism | Age of first facial hair, Hair colour, Skin cancer, Skin colour, Sunburn, Tanning                                                                                                                                                                                                                                                                                                                    |
| rs1648303 * | 15 | 2.72E-08 | <i>DUOX1</i>           |                                                                                                                                                                                          |                                                                                                                                                                                                                                                                                                                                                                                                      |
| rs10083695  | 15 | 8.00E-13 | <i>WDR72</i>           |                                                                                                                                                                                          | Haematocrit, Red blood cell count                                                                                                                                                                                                                                                                                                                                                                    |
| rs3825991   | 15 | 2.70E-31 | <i>RLBP1</i>           |                                                                                                                                                                                          | Age at menopause                                                                                                                                                                                                                                                                                                                                                                                     |
| rs1372613 * | 15 | 1.31E-10 | <i>LINS1</i>           |                                                                                                                                                                                          |                                                                                                                                                                                                                                                                                                                                                                                                      |
| rs7206532   | 16 | 1.86E-09 | <i>DYNLRB2</i>         | Spherical power                                                                                                                                                                          |                                                                                                                                                                                                                                                                                                                                                                                                      |
| rs142963458 | 16 | 3.58E-18 | <i>MEAK7</i>           | Macular thickness                                                                                                                                                                        |                                                                                                                                                                                                                                                                                                                                                                                                      |
| rs1049868   | 16 | 1.91E-09 | <i>GSE1</i>            |                                                                                                                                                                                          | Platelet traits                                                                                                                                                                                                                                                                                                                                                                                      |
| rs62064364  | 17 | 4.11E-16 | <i>LINC02210-CRHR1</i> | Macular thickness                                                                                                                                                                        | Alcohol consumption, Average total household income, Cereal type, Forced vital capacity, Hair/balding pattern, Hand grip strength, Height, Mean platelet volume, Mean reticulocyte volume, Mean spheroid cell volume, Nap during day, Neuroticism, Oily fish intake, Plays computer games, Red blood cell traits, Relative age of first facial hair, White matter microstructure axial diffusivities |

|              |    |          |         |                                                                                                                                          |                                                                                                                                         |
|--------------|----|----------|---------|------------------------------------------------------------------------------------------------------------------------------------------|-----------------------------------------------------------------------------------------------------------------------------------------|
| rs4794029    | 17 | 1.95E-13 | ABI3    | Spherical power                                                                                                                          | Angina, Body fat, Coronary artery disease, Eosinophil traits, Forced expiratory volume, Height, High blood pressure, Impedance of limbs |
| rs56737642   | 17 | 2.87E-11 | FAAP100 | Age started wearing glasses, Catatract, Logmar, Spherical power                                                                          | Ankle spacing width, Hair colour, Skin colour, Tanning                                                                                  |
| rs61586425 * | 17 | 4.78E-12 | NPLOC4  |                                                                                                                                          |                                                                                                                                         |
| rs62075724   | 17 | 2.91E-12 | TSPAN10 | Amblyopia, Cylindrical power, Logmar, Myopia, Spherical power                                                                            | Hair colour, Tanning                                                                                                                    |
| rs7405453    | 17 | 2.24E-33 | TSPAN10 | Age started wearing glasses, Amblyopia, Astigmatism, Cylindrical power, Intraocular pressure, Logmar, Macular thickness, Spherical power | Ankle spacing width, Hair colour, Tanning                                                                                               |
| rs4800994    | 18 | 7.83E-10 | TCF4    |                                                                                                                                          | Frequency of stair climbing, Hot drink temperature, Length of time at current address, Number of days worked >10 mins, Works dayshift   |
| rs1517034    | 18 | 3.90E-16 | RAX     |                                                                                                                                          | Eotaxin levels                                                                                                                          |
| rs17696543 * | 18 | 2.93E-17 | CPLX4   |                                                                                                                                          |                                                                                                                                         |
| rs76076446   | 19 | 1.07E-13 | RAX2    | Age-related macular degeneration, Cone-rod dystrophy, Macular thickness, Retinal dystrophy                                               |                                                                                                                                         |
| rs1232603    | 20 | 4.80E-12 | JAG1    |                                                                                                                                          | Birth weight, Haematocrit percentage, Haemoglobin concentration, Heel bone mineral density, Impedance of limbs, Red blood cell count    |

|             |    |          |                 |                                                          |                                                                                                              |
|-------------|----|----------|-----------------|----------------------------------------------------------|--------------------------------------------------------------------------------------------------------------|
| rs6077977   | 20 | 4.98E-19 | <i>JAG1</i>     |                                                          | Heel bone mineral density, Height                                                                            |
| rs8132685 * | 21 | 3.58E-09 | <i>C21orf62</i> |                                                          |                                                                                                              |
| rs2032576 * | 22 | 4.80E-08 | <i>MIATNB</i>   |                                                          |                                                                                                              |
| rs5752638   | 22 | 1.63E-16 | <i>MNI</i>      |                                                          | Cereal intake, Eosinophil count, Mean reticulocyte volume, Platelet traits, Pulse rate, Red blood cell count |
| rs5763593 * | 22 | 1.01E-10 | <i>MTMR3</i>    |                                                          |                                                                                                              |
| rs2073946   | 22 | 5.17E-17 | <i>LIF-AS1</i>  |                                                          | Heel bone mineral density, Immature reticulocyte fraction                                                    |
| rs75159625  | 22 | 2.83E-10 | <i>WNT7B</i>    | Macular thickness, Spherical power, Strong/weak meridian | Anthropometric traits, Contracture of palmar fascia, Haematocrit percentage, Red blood cell count            |
