# Supplementary material for: Sub-cellular level resolution of common genetic variation in the photoreceptor layer identifies continuum between rare disease and common variation
Source: PubMed Central journal article supplement (PMC9997913; doi:10.1371/journal.pgen.1010587), 2023-02-27
Supplement: pgen.1010587.s009.pdf [file pgen.1010587.s009.pdf]

| SNP         | Chr | BP        | A1 | A2 | AF   | MTAG<br>effect<br>size | ONL<br>effect<br>size | OS<br>effect<br>size | IS<br>effect<br>size | MTAG<br>p-value | ONL<br>p-value | OS<br>p-value | IS<br>p-value | MTAG<br>SE | ONL<br>SE | OS<br>SE | IS<br>SE |
|-------------|-----|-----------|----|----|------|------------------------|-----------------------|----------------------|----------------------|-----------------|----------------|---------------|---------------|------------|-----------|----------|----------|
| rs112248193 | 1   | 3718402   | A  | G  | 0.13 | -0.09                  | -0.26                 | -0.02                | -0.09                | 2.73E-09        | 5.43E-04       | 0.60          | 2.73E-09      | 0.02       | 0.07      | 0.05     | 0.02     |
| rs2128416   | 1   | 10700448  | C  | T  | 0.15 | -0.53                  | -0.53                 | -0.02                | -0.06                | 4.83E-13        | 4.83E-13       | 0.63          | 1.99E-04      | 0.07       | 0.07      | 0.04     | 0.02     |
| rs11587687  | 1   | 110147801 | A  | G  | 0.44 | 0.18                   | -0.08                 | 0.18                 | 0.01                 | 5.02E-09        | 0.12           | 5.02E-09      | 0.30          | 0.03       | 0.05      | 0.03     | 0.01     |
| rs3790612   | 1   | 113084146 | A  | G  | 0.26 | -0.27                  | -0.08                 | -0.27                | -0.01                | 2.60E-15        | 0.17           | 2.60E-15      | 0.55          | 0.03       | 0.06      | 0.03     | 0.01     |
| rs72683442  | 1   | 113468825 | C  | T  | 0.22 | -0.35                  | -0.20                 | -0.35                | -0.02                | 4.13E-21        | 1.18E-03       | 4.13E-21      | 0.16          | 0.04       | 0.06      | 0.04     | 0.01     |
| rs410895    | 1   | 196898226 | C  | T  | 0.55 | 0.30                   | 0.06                  | 0.30                 | -0.01                | 8.19E-22        | 0.23           | 8.19E-22      | 0.17          | 0.03       | 0.05      | 0.03     | 0.01     |
| rs6427827   | 1   | 200398387 | A  | T  | 0.62 | 0.42                   | 0.42                  | -0.04                | 0.05                 | 2.50E-16        | 2.50E-16       | 0.22          | 2.23E-06      | 0.05       | 0.05      | 0.03     | 0.01     |
| rs11577827  | 1   | 202798831 | T  | C  | 0.53 | 0.37                   | 0.37                  | 0.07                 | 0.05                 | 2.77E-13        | 2.77E-13       | 0.03          | 6.56E-06      | 0.05       | 0.05      | 0.03     | 0.01     |
| rs919655    | 1   | 214157972 | A  | G  | 0.12 | 0.46                   | 0.46                  | 2.03E-03             | 0.08                 | 2.36E-09        | 2.36E-09       | 0.97          | 4.00E-07      | 0.08       | 0.08      | 0.05     | 0.02     |
| rs12140498  | 1   | 222098690 | T  | C  | 0.20 | 0.37                   | 0.37                  | 0.08                 | 0.05                 | 3.14E-09        | 3.14E-09       | 0.04          | 2.89E-05      | 0.06       | 0.06      | 0.04     | 0.01     |
| rs6426584   | 1   | 227374949 | T  | A  | 0.34 | 0.07                   | 0.28                  | -0.03                | 0.07                 | 7.03E-11        | 1.62E-07       | 0.36          | 7.03E-11      | 0.01       | 0.05      | 0.03     | 0.01     |
| rs7594221   | 2   | 24112724  | A  | T  | 0.76 | 0.28                   | 0.23                  | 0.28                 | 0.03                 | 1.07E-14        | 8.19E-05       | 1.07E-14      | 0.01          | 0.04       | 0.06      | 0.04     | 0.01     |
| rs116350483 | 2   | 145338686 | T  | C  | 0.02 | -2.11                  | -2.11                 | -0.16                | -0.33                | 2.10E-26        | 2.10E-26       | 0.19          | 2.86E-15      | 0.20       | 0.20      | 0.12     | 0.04     |
| rs80265589  | 2   | 169027979 | A  | T  | 0.27 | -0.42                  | -0.42                 | -0.14                | -0.06                | 1.86E-13        | 1.86E-13       | 2.80E-05      | 4.21E-08      | 0.06       | 0.06      | 0.03     | 0.01     |
| rs28416292  | 2   | 182507470 | A  | T  | 0.15 | 0.08                   | 0.34                  | -0.02                | 0.08                 | 1.78E-08        | 1.61E-06       | 0.61          | 1.78E-08      | 0.01       | 0.07      | 0.04     | 0.01     |
| rs58172089  | 2   | 198916926 | A  | G  | 0.17 | 0.23                   | -0.07                 | 0.23                 | -0.03                | 2.74E-08        | 0.32           | 2.74E-08      | 0.03          | 0.04       | 0.07      | 0.04     | 0.01     |
| rs3755152   | 2   | 216822197 | G  | A  | 0.89 | -0.31                  | 0.42                  | -0.31                | 0.05                 | 4.39E-10        | 5.15E-07       | 4.39E-10      | 1.83E-03      | 0.05       | 0.08      | 0.05     | 0.02     |
| rs148388367 | 2   | 216850944 | A  | T  | 0.04 | -1.30                  | -1.30                 | 0.56                 | -0.14                | 1.20E-21        | 1.20E-21       | 9.63E-12      | 1.18E-06      | 0.14       | 0.14      | 0.08     | 0.03     |
| rs201030469 | 2   | 218321984 | G  | A  | 0.14 | -0.42                  | -0.42                 | -0.01                | -0.07                | 6.58E-09        | 6.58E-09       | 0.82          | 1.30E-05      | 0.07       | 0.07      | 0.04     | 0.02     |
| rs7564805   | 2   | 234228946 | G  | A  | 0.05 | -0.78                  | -0.07                 | -0.78                | 0.01                 | 6.16E-29        | 0.52           | 6.16E-29      | 0.55          | 0.07       | 0.12      | 0.07     | 0.02     |
| rs34234056  | 3   | 14418444  | G  | A  | 0.51 | 0.17                   | 0.01                  | 0.17                 | -1.87E-03            | 2.37E-08        | 0.78           | 2.37E-08      | 0.86          | 0.03       | 0.05      | 0.03     | 0.01     |
| rs11129176  | 3   | 25049310  | A  | G  | 0.28 | 0.32                   | 0.32                  | 0.02                 | 0.04                 | 1.53E-08        | 1.53E-08       | 0.60          | 1.31E-04      | 0.06       | 0.06      | 0.03     | 0.01     |
| rs6775323   | 3   | 27721085  | T  | G  | 0.20 | 0.49                   | 0.49                  | -0.04                | 0.08                 | 5.79E-15        | 5.79E-15       | 0.34          | 4.35E-09      | 0.06       | 0.06      | 0.04     | 0.01     |
| rs62282867  | 3   | 100972078 | A  | G  | 0.79 | 0.34                   | -0.16                 | 0.34                 | -1.98E-03            | 4.63E-19        | 0.01           | 4.63E-19      | 0.88          | 0.04       | 0.06      | 0.04     | 0.01     |
| rs111163508 | 3   | 129235423 | C  | G  | 0.16 | -0.39                  | 0.23                  | -0.39                | 0.03                 | 2.28E-20        | 9.22E-04       | 2.28E-20      | 0.03          | 0.04       | 0.07      | 0.04     | 0.01     |
| rs7430585   | 3   | 150112041 | A  | G  | 0.76 | 0.23                   | 0.10                  | 0.23                 | -0.05                | 1.26E-10        | 0.09           | 1.26E-10      | 2.66E-05      | 0.04       | 0.06      | 0.04     | 0.01     |
| rs115237855 | 5   | 17186336  | A  | G  | 0.03 | -0.68                  | 0.17                  | -0.68                | 0.03                 | 3.73E-12        | 0.29           | 3.73E-12      | 0.31          | 0.10       | 0.16      | 0.10     | 0.03     |
| rs78303234  | 5   | 17218432  | G  | C  | 0.12 | -0.26                  | -0.10                 | -0.26                | 0.01                 | 3.32E-08        | 0.21           | 3.32E-08      | 0.58          | 0.05       | 0.08      | 0.05     | 0.02     |
| rs30373     | 5   | 55745334  | G  | C  | 0.37 | 0.32                   | 0.32                  | 0.11                 | 0.04                 | 7.70E-10        | 7.70E-10       | 3.86E-04      | 4.10E-05      | 0.05       | 0.05      | 0.03     | 0.01     |
| rs63338061  | 5   | 71486228  | T  | C  | 0.36 | 0.07                   | 0.31                  | -7.24E-05            | 0.07                 | 9.81E-11        | 3.71E-09       | 0.99          | 9.81E-11      | 0.01       | 0.05      | 0.03     | 0.01     |
| rs17421627  | 5   | 87847586  | G  | T  | 0.07 | 1.15                   | 1.15                  | 0.16                 | 0.17                 | 3.30E-33        | 3.30E-33       | 0.01          | 4.57E-17      | 0.10       | 0.10      | 0.06     | 0.02     |
| rs62391700  | 5   | 126093395 | C  | T  | 0.20 | -0.45                  | -0.45                 | -0.13                | -0.03                | 5.05E-13        | 5.05E-13       | 7.46E-04      | 0.04          | 0.06       | 0.06      | 0.04     | 0.01     |
| rs1109114   | 5   | 148615946 | T  | C  | 0.43 | 0.37                   | 0.37                  | -0.04                | 0.07                 | 2.65E-13        | 2.65E-13       | 0.23          | 1.28E-10      | 0.05       | 0.05      | 0.03     | 0.01     |
| rs1438692   | 5   | 148659664 | A  | G  | 0.42 | 0.07                   | 0.32                  | -0.01                | 0.07                 | 1.32E-11        | 3.59E-10       | 0.75          | 1.32E-11      | 0.01       | 0.05      | 0.03     | 0.01     |
| rs6875105   | 5   | 173054917 | C  | T  | 0.38 | -0.38                  | -0.38                 | -0.03                | -0.03                | 1.39E-13        | 1.39E-13       | 0.27          | 4.48E-03      | 0.05       | 0.05      | 0.03     | 0.01     |
| rs2326838   | 6   | 6901663   | A  | G  | 0.36 | -0.23                  | -0.07                 | -0.23                | -1.50E-03            | 7.86E-13        | 0.18           | 7.86E-13      | 0.89          | 0.03       | 0.05      | 0.03     | 0.01     |
| rs12192672  | 6   | 7229619   | A  | G  | 0.30 | -0.34                  | -0.34                 | 0.01                 | -0.04                | 8.88E-10        | 8.88E-10       | 0.76          | 1.13E-04      | 0.06       | 0.06      | 0.03     | 0.01     |
| rs17507554  | 6   | 11394287  | A  | G  | 0.05 | 0.69                   | 0.69                  | -0.11                | 0.10                 | 3.93E-09        | 3.93E-09       | 0.14          | 4.14E-05      | 0.12       | 0.12      | 0.07     | 0.02     |
| rs6923949   | 6   | 35496366  | G  | A  | 0.82 | 0.23                   | 0.36                  | 0.23                 | 0.04                 | 4.22E-09        | 4.95E-08       | 4.22E-09      | 9.96E-04      | 0.04       | 0.07      | 0.04     | 0.01     |
| rs375435    | 6   | 42661404  | C  | T  | 0.57 | -0.25                  | -0.06                 | -0.25                | -0.01                | 3.56E-16        | 0.20           | 3.56E-16      | 0.62          | 0.03       | 0.05      | 0.03     | 0.01     |
| rs6910414   | 6   | 56726737  | G  | A  | 0.18 | 0.42                   | 0.42                  | -0.16                | -0.01                | 1.87E-10        | 1.87E-10       | 7.37E-05      | 0.67          | 0.07       | 0.07      | 0.04     | 0.01     |
| rs947340    | 6   | 76747944  | C  | A  | 0.70 | -0.25                  | -0.05                 | -0.25                | 0.03                 | 1.17E-13        | 0.34           | 1.17E-13      | 0.02          | 0.03       | 0.06      | 0.03     | 0.01     |
| rs74526772  | 6   | 106515218 | A  | T  | 0.04 | -1.25                  | -1.25                 | -0.01                | -0.18                | 1.13E-19        | 1.13E-19       | 0.90          | 6.24E-10      | 0.14       | 0.14      | 0.08     | 0.03     |
| rs9639276   | 7   | 867033    | T  | C  | 0.17 | 0.41                   | 0.41                  | -0.01                | 0.08                 | 4.74E-10        | 4.74E-10       | 0.75          | 3.79E-09      | 0.07       | 0.07      | 0.04     | 0.01     |

|             |    |           |   |   |      |       |       |           |       |           |            |          |           |      |      |      |      |
|-------------|----|-----------|---|---|------|-------|-------|-----------|-------|-----------|------------|----------|-----------|------|------|------|------|
| rs12531825  | 7  | 8005174   | A | G | 0.12 | 0.45  | 0.45  | 0.09      | 0.08  | 5.94E-09  | 5.94E-09   | 0.07     | 2.34E-06  | 0.08 | 0.08 | 0.05 | 0.02 |
| rs12719025  | 7  | 51100190  | G | A | 0.46 | 0.49  | 0.49  | -3.73E-03 | 0.07  | 6.39E-22  | 6.39E-22   | 0.90     | 1.33E-10  | 0.05 | 0.05 | 0.03 | 0.01 |
| rs111963714 | 7  | 99948655  | G | T | 0.21 | 0.27  | 0.20  | 0.27      | 0.03  | 5.96E-13  | 1.54E-03   | 5.96E-13 | 0.05      | 0.04 | 0.06 | 0.04 | 0.01 |
| rs34926272  | 7  | 129591807 | C | G | 0.03 | -1.05 | -1.05 | -0.15     | -0.18 | 2.03E-11  | 2.03E-11   | 0.11     | 4.44E-08  | 0.16 | 0.16 | 0.10 | 0.03 |
| rs62490856  | 8  | 10469030  | A | G | 0.13 | 0.33  | -0.09 | 0.33      | 0.04  | 5.02E-13  | 0.25       | 5.02E-13 | 0.01      | 0.05 | 0.08 | 0.05 | 0.02 |
| rs61675430  | 8  | 61671071  | A | G | 0.20 | -0.41 | -0.41 | -7.74E-04 | -0.06 | 1.30E-10  | 1.30E-10   | 0.98     | 1.33E-05  | 0.06 | 0.06 | 0.04 | 0.01 |
| rs13263941  | 8  | 109121945 | C | T | 0.26 | 0.86  | 0.86  | 0.15      | 0.12  | 2.07E-50  | 2.07E-50   | 1.72E-05 | 6.09E-24  | 0.06 | 0.06 | 0.04 | 0.01 |
| rs376067714 | 8  | 109141863 | G | A | 0.18 | 0.77  | 0.77  | 0.06      | 0.11  | 2.73E-24  | 2.73E-24   | 0.17     | 4.14E-12  | 0.08 | 0.08 | 0.05 | 0.02 |
| rs9298817   | 9  | 21576591  | C | A | 0.66 | -0.51 | -0.51 | -0.04     | -0.04 | 2.90E-22  | 2.90E-22   | 0.21     | 6.77E-04  | 0.05 | 0.05 | 0.03 | 0.01 |
| rs10781177  | 9  | 76593011  | T | C | 0.42 | -0.29 | -0.29 | -0.01     | -0.05 | 1.49E-08  | 1.49E-08   | 0.64     | 1.12E-05  | 0.05 | 0.05 | 0.03 | 0.01 |
| rs717299    | 9  | 77185933  | G | A | 0.45 | 0.37  | 0.37  | 0.06      | 0.04  | 3.80E-13  | 3.80E-13   | 0.04     | 9.57E-05  | 0.05 | 0.05 | 0.03 | 0.01 |
| rs111245635 | 10 | 48389841  | T | C | 0.02 | 1.26  | 1.26  | 0.30      | 0.23  | 8.41E-10  | 8.41E-10   | 0.02     | 1.27E-07  | 0.21 | 0.21 | 0.12 | 0.04 |
| rs1947075   | 10 | 49741135  | T | C | 0.64 | -0.32 | -0.32 | -0.07     | -0.05 | 7.86E-10  | 7.86E-10   | 0.04     | 3.66E-06  | 0.05 | 0.05 | 0.03 | 0.01 |
| rs7916697   | 10 | 69991853  | G | A | 0.76 | -0.43 | -0.43 | -0.14     | -0.06 | 3.80E-13  | 3.80E-13   | 1.40E-04 | 1.51E-07  | 0.06 | 0.06 | 0.04 | 0.01 |
| rs11200922  | 10 | 85961758  | G | A | 0.46 | 0.33  | 0.08  | 0.33      | -0.03 | 1.62E-26  | 0.12       | 1.62E-26 | 0.01      | 0.03 | 0.05 | 0.03 | 0.01 |
| rs34309160  | 10 | 104034550 | T | C | 0.07 | -0.53 | -0.53 | -0.04     | -0.06 | 3.34E-08  | 3.34E-08   | 0.55     | 0.01      | 0.10 | 0.10 | 0.06 | 0.02 |
| rs17102399  | 10 | 123435963 | A | G | 0.05 | 0.67  | 0.67  | -0.02     | 0.07  | 2.44E-08  | 2.44E-08   | 0.75     | 3.95E-03  | 0.12 | 0.12 | 0.07 | 0.03 |
| rs60401382  | 10 | 124227624 | T | C | 0.23 | -0.30 | 0.07  | -0.30     | 0.03  | 2.43E-16  | 0.27       | 2.43E-16 | 0.01      | 0.04 | 0.06 | 0.04 | 0.01 |
| rs1016934   | 11 | 31720621  | G | A | 0.30 | -0.39 | -0.39 | 0.02      | -0.03 | 2.18E-12  | 2.18E-12   | 0.46     | 0.01      | 0.06 | 0.06 | 0.03 | 0.01 |
| rs618838    | 11 | 66328719  | C | T | 0.55 | 0.06  | 0.19  | 0.03      | 0.06  | 1.79E-09  | 1.49E-04   | 0.28     | 1.79E-09  | 0.01 | 0.05 | 0.03 | 0.01 |
| rs116233906 | 11 | 68968271  | A | C | 0.04 | -0.94 | -0.94 | -0.04     | -0.11 | 9.33E-14  | 9.33E-14   | 0.59     | 3.09E-05  | 0.13 | 0.13 | 0.08 | 0.03 |
| rs10737153  | 11 | 69281829  | C | A | 0.57 | -0.30 | -0.30 | -0.02     | -0.03 | 3.18E-09  | 3.18E-09   | 0.48     | 3.00E-03  | 0.05 | 0.05 | 0.03 | 0.01 |
| rs12574286  | 11 | 76937602  | C | G | 0.21 | -0.29 | 0.01  | -0.29     | 0.01  | 5.77E-15  | 0.93       | 5.77E-15 | 0.41      | 0.04 | 0.06 | 0.04 | 0.01 |
| rs1126809   | 11 | 89017961  | A | G | 0.30 | -0.32 | 0.20  | -0.32     | 0.04  | 2.56E-22  | 2.49E-04   | 2.56E-22 | 1.04E-03  | 0.03 | 0.05 | 0.03 | 0.01 |
| rs6483429   | 11 | 95239787  | T | C | 0.46 | -0.30 | -0.30 | 8.18E-04  | -0.04 | 2.67E-09  | 2.67E-09   | 0.98     | 4.72E-04  | 0.05 | 0.05 | 0.03 | 0.01 |
| rs2080402   | 12 | 345175    | C | T | 0.56 | 0.22  | -0.13 | 0.22      | -0.03 | 2.21E-12  | 0.01       | 2.21E-12 | 3.18E-03  | 0.03 | 0.05 | 0.03 | 0.01 |
| rs3138142   | 12 | 56115585  | T | C | 0.24 | 0.96  | 0.96  | 0.48      | 0.10  | 5.58E-60  | 5.58E-60   | 5.01E-41 | 7.10E-17  | 0.06 | 0.06 | 0.04 | 0.01 |
| rs76629482  | 12 | 96178789  | G | C | 0.18 | -0.53 | -0.53 | -0.06     | -0.07 | 3.38E-16  | 3.38E-16   | 0.151    | 3.69E-07  | 0.07 | 0.07 | 0.04 | 0.01 |
| rs9796234   | 13 | 114323997 | C | T | 0.52 | 0.27  | 0.19  | 0.27      | 0.03  | 4.69E-18  | 1.57E-04   | 4.69E-18 | 3.13E-03  | 0.03 | 0.05 | 0.03 | 0.01 |
| rs28468687  | 14 | 36026342  | A | G | 0.18 | 0.38  | 0.38  | 0.06      | 0.05  | 1.02E-08  | 1.02E-08   | 0.13     | 2.01E-04  | 0.07 | 0.07 | 0.04 | 0.01 |
| rs1254260   | 14 | 60835737  | A | G | 0.29 | -0.20 | 0.25  | -0.20     | -0.03 | 1.18E-09  | 7.86E-06   | 1.18E-09 | 0.01      | 0.03 | 0.06 | 0.03 | 0.01 |
| rs1956524   | 14 | 68800393  | A | G | 0.64 | 0.29  | 0.29  | 0.02      | 0.04  | 2.13E-08  | 2.13E-08   | 0.59     | 1.09E-03  | 0.05 | 0.05 | 0.03 | 0.01 |
| rs10135971  | 14 | 69517494  | A | G | 0.34 | 0.43  | 0.43  | -0.02     | 0.03  | 4.47E-16  | 4.47E-16   | 0.45     | 0.01      | 0.05 | 0.05 | 0.03 | 0.01 |
| rs112145470 | 14 | 74356090  | A | G | 0.03 | 1.34  | 1.34  | 0.09      | 0.14  | 4.81E-16  | 4.81E-16   | 0.40     | 3.64E-05  | 0.17 | 0.17 | 0.10 | 0.03 |
| rs368205955 | 14 | 74497636  | G | T | 0.02 | -3.19 | -3.19 | -0.24     | -0.50 | 4.13E-46  | 4.13E-46   | 0.08     | 1.56E-26  | 0.22 | 0.22 | 0.14 | 0.05 |
| rs12147951  | 14 | 74642451  | C | A | 0.07 | -2.34 | -2.34 | -0.10     | -0.38 | 8.89E-112 | 8.89E-112  | 0.13     | 4.78E-67  | 0.10 | 0.10 | 0.06 | 0.02 |
| rs1972565   | 14 | 74666824  | G | A | 0.82 | 1.91  | 1.91  | 0.11      | 0.30  | 5.23E-191 | 5.23E-191  | 0.01     | 7.95E-106 | 0.06 | 0.06 | 0.04 | 0.01 |
| rs1972564   | 14 | 74666944  | T | C | 0.48 | 1.03  | 1.03  | -0.04     | 0.15  | 2.93E-74  | 2.93E-74   | 0.22     | 1.40E-37  | 0.06 | 0.06 | 0.03 | 0.01 |
| rs118186707 | 14 | 74686575  | A | G | 0.03 | 1.77  | 1.77  | 0.03      | 0.27  | 1.70E-32  | 1.70E-32   | 0.74     | 5.61E-18  | 0.15 | 0.15 | 0.09 | 0.03 |
| rs28488340  | 14 | 74693803  | G | C | 0.40 | -0.59 | -0.59 | -0.05     | -0.08 | 9.02E-31  | 9.02E-31   | 0.14     | 1.07E-13  | 0.05 | 0.05 | 0.03 | 0.01 |
| rs888413    | 14 | 75267396  | T | C | 0.47 | 0.39  | 0.39  | 0.07      | 0.07  | 1.92E-14  | 1.92E-14   | 0.02     | 3.64E-10  | 0.05 | 0.05 | 0.03 | 0.01 |
| rs1800407   | 15 | 28230318  | T | C | 0.08 | 0.57  | -0.03 | 0.57      | -0.02 | 7.58E-25  | 0.70246515 | 7.58E-25 | 0.34      | 0.06 | 0.09 | 0.06 | 0.02 |
| rs1648303   | 15 | 45445692  | G | A | 0.57 | -0.28 | -0.28 | -0.01     | -0.04 | 2.72E-08  | 2.72E-08   | 0.66     | 8.32E-04  | 0.05 | 0.05 | 0.03 | 0.01 |
| rs10083695  | 15 | 53987147  | G | A | 0.49 | -0.36 | -0.36 | -0.06     | -0.06 | 8.00E-13  | 8.00E-13   | 0.03     | 5.67E-09  | 0.05 | 0.05 | 0.03 | 0.01 |
| rs3825991   | 15 | 89761664  | A | C | 0.47 | 0.36  | 0.05  | 0.36      | -0.04 | 2.70E-31  | 0.29       | 2.70E-31 | 1.10E-04  | 0.03 | 0.05 | 0.03 | 0.01 |
| rs1372613   | 15 | 101204835 | T | C | 0.30 | 0.35  | 0.35  | 0.02      | 0.06  | 1.31E-10  | 1.31E-10   | 0.63     | 2.60E-07  | 0.05 | 0.05 | 0.03 | 0.01 |
| rs7206532   | 16 | 80490131  | C | T | 0.52 | 0.30  | 0.30  | 0.02      | 0.03  | 1.86E-09  | 1.86E-09   | 0.56     | 3.06E-03  | 0.05 | 0.05 | 0.03 | 0.01 |

|             |    |          |   |   |      |       |           |           |           |          |          |          |          |      |      |      |      |
|-------------|----|----------|---|---|------|-------|-----------|-----------|-----------|----------|----------|----------|----------|------|------|------|------|
| rs142963458 | 16 | 84561361 | T | C | 0.04 | -0.73 | 0.77      | -0.73     | 0.13      | 3.58E-18 | 3.55E-08 | 3.58E-18 | 4.56E-06 | 0.08 | 0.14 | 0.08 | 0.03 |
| rs1049868   | 16 | 85706633 | C | T | 0.29 | -0.34 | -0.34     | 0.02      | -0.05     | 1.91E-09 | 1.91E-09 | 0.61     | 3.52E-05 | 0.06 | 0.06 | 0.03 | 0.01 |
| rs62064364  | 17 | 43654468 | T | C | 0.22 | 0.50  | 0.50      | 0.02      | 0.07      | 4.11E-16 | 4.11E-16 | 0.65     | 1.71E-07 | 0.06 | 0.06 | 0.04 | 0.01 |
| rs4794029   | 17 | 47280301 | C | T | 0.68 | 0.24  | 0.06      | 0.24      | -0.04     | 1.95E-13 | 0.27     | 1.95E-13 | 1.28E-04 | 0.03 | 0.05 | 0.03 | 0.01 |
| rs56737642  | 17 | 79515509 | G | A | 0.48 | -0.34 | -0.34     | 0.21      | -0.06     | 2.87E-11 | 2.87E-11 | 4.64E-11 | 3.90E-08 | 0.05 | 0.05 | 0.03 | 0.01 |
| rs61586425  | 17 | 79590835 | A | C | 0.09 | -0.48 | -0.14     | -0.48     | -3.22E-03 | 4.78E-12 | 0.22     | 4.78E-12 | 0.89     | 0.07 | 0.11 | 0.07 | 0.02 |
| rs62075724  | 17 | 79611410 | C | T | 0.46 | 0.38  | 0.38      | -0.21     | 0.07      | 2.91E-12 | 2.91E-12 | 1.12E-10 | 1.94E-09 | 0.05 | 0.05 | 0.03 | 0.01 |
| rs7405453   | 17 | 79615572 | G | A | 0.65 | -0.39 | 0.40      | -0.39     | 0.07      | 2.24E-33 | 4.81E-14 | 2.24E-33 | 3.40E-10 | 0.03 | 0.05 | 0.03 | 0.01 |
| rs4800994   | 18 | 53403850 | T | C | 0.19 | 0.08  | 0.31      | -0.12     | 0.08      | 7.83E-10 | 1.33E-06 | 1.88E-03 | 7.83E-10 | 0.01 | 0.06 | 0.04 | 0.01 |
| rs1517034   | 18 | 56937489 | A | G | 0.31 | 0.45  | 0.45      | -1.38E-03 | 0.07      | 3.90E-16 | 3.90E-16 | 0.97     | 9.89E-11 | 0.05 | 0.05 | 0.03 | 0.01 |
| rs17696543  | 18 | 56971398 | T | C | 0.18 | -0.56 | -0.56     | 4.79E-03  | -0.09     | 2.93E-17 | 2.93E-17 | 0.90     | 2.62E-10 | 0.07 | 0.07 | 0.04 | 0.01 |
| rs76076446  | 19 | 3771586  | A | G | 0.02 | -1.25 | -1.25     | 0.14      | -0.15     | 1.07E-13 | 1.07E-13 | 0.19     | 2.19E-05 | 0.17 | 0.17 | 0.10 | 0.04 |
| rs1232603   | 20 | 10612963 | T | C | 0.33 | -0.23 | -4.45E-03 | -0.23     | 0.01      | 4.80E-12 | 0.93     | 4.80E-12 | 0.56     | 0.03 | 0.05 | 0.03 | 0.01 |
| rs6077977   | 20 | 10930708 | G | A | 0.49 | 0.27  | -0.09     | 0.27      | -0.01     | 4.98E-19 | 0.08     | 4.98E-19 | 0.28     | 0.03 | 0.05 | 0.03 | 0.01 |
| rs8132685   | 21 | 34220618 | T | C | 0.52 | -0.30 | -0.30     | -0.02     | -0.04     | 3.58E-09 | 3.58E-09 | 0.54     | 1.01E-04 | 0.05 | 0.05 | 0.03 | 0.01 |
| rs2032576   | 22 | 27089655 | T | G | 0.56 | -0.28 | -0.28     | 0.03      | -0.04     | 4.80E-08 | 4.80E-08 | 0.41     | 1.19E-04 | 0.05 | 0.05 | 0.03 | 0.01 |
| rs5752638   | 22 | 28188203 | C | T | 0.22 | -0.51 | -0.51     | -0.09     | -0.07     | 1.63E-16 | 1.63E-16 | 0.02     | 2.89E-08 | 0.06 | 0.06 | 0.04 | 0.01 |
| rs5763593   | 22 | 30302238 | C | T | 0.63 | 0.34  | 0.34      | -0.01     | 0.06      | 1.01E-10 | 1.01E-10 | 0.74     | 3.12E-09 | 0.05 | 0.05 | 0.03 | 0.01 |
| rs2073946   | 22 | 30619599 | A | G | 0.31 | 0.46  | 0.46      | 0.07      | 0.08      | 5.17E-17 | 5.17E-17 | 0.04     | 2.82E-11 | 0.06 | 0.06 | 0.03 | 0.01 |
| rs75159625  | 22 | 46377008 | G | T | 0.31 | 0.34  | 0.34      | 0.05      | 0.05      | 2.83E-10 | 2.83E-10 | 0.15     | 5.33E-05 | 0.05 | 0.05 | 0.03 | 0.01 |
