# Supplementary material for: Sub-cellular level resolution of common genetic variation in the photoreceptor layer identifies continuum between rare disease and common variation
Source: PubMed Central journal article supplement (PMC9997913; doi:10.1371/journal.pgen.1010587), 2023-02-27
Supplement: pgen.1010587.s010.pdf [file pgen.1010587.s010.pdf]

| <b>Gene</b>                                                  | <b>Location</b> | <b>Encoded Protein and Function</b>                                                                                         | <b>Mendelian disease</b>                                                | <b>Mode of inheritance</b> |
|--------------------------------------------------------------|-----------------|-----------------------------------------------------------------------------------------------------------------------------|-------------------------------------------------------------------------|----------------------------|
| <i>Genes associated with rare monogenic retinal diseases</i> |                 |                                                                                                                             |                                                                         |                            |
| <i>CDHR1</i> <sup>a,c</sup>                                  | 10q23.1         | Cadherin-related family member 1 (maintains rod and cone outer segment structure)                                           | Cone-rod dystrophy; macular dystrophy                                   | Recessive                  |
| <i>CERKL</i> <sup>a</sup>                                    | 2q31.3          | Ceramide kinase-like protein (role in viability of cells with membranes rich in sphingolipids)                              | Rod-cone dystrophy; cone-rod dystrophy; widespread retinal degeneration | Recessive                  |
| <i>GNAT2</i> <sup>a</sup>                                    | 1p13.3          | Cone-specific transducin (part of the phototransduction cascade in cone photoreceptors)                                     | Achromatopsia (non-functioning cone photoreceptors)                     | Recessive                  |
| <i>GRK1</i> <sup>a</sup>                                     | 13q34           | G-protein receptor kinase 1, rhodopsin kinase (phosphorylates activated rhodopsin to permit shut-off of the light response) | Oguchi disease, retinitis pigmentosa                                    | Recessive                  |
| <i>IMPG1</i> <sup>a</sup>                                    | 6q14.1          | Interphotoreceptor matrix proteoglycan 1 (role in retinal cell adhesion/ interphotoreceptor matrix)                         | Retinitis pigmentosa; vitelliform macular dystrophy                     | Dominant and recessive     |
| <i>IMPG2</i> <sup>a</sup>                                    | 3q12.3          | Interphotoreceptor matrix proteoglycan 2 (role in retinal cell adhesion/ interphotoreceptor matrix)                         | Retinitis pigmentosa; vitelliform macular dystrophy                     | Dominant and recessive     |
| <i>JAG1</i> <sup>a</sup>                                     | 20p12.2         | Jagged protein 1 (ligand for Notch proteins; function in cell-cell signalling)                                              | Alagille syndrome                                                       | Dominant                   |
| <i>PRPH2</i> <sup>a</sup>                                    | 6p21.1          | Peripherin-2 (important for rod and cone outer segment disc structure)                                                      | Macular pattern dystrophy; retinitis pigmentosa                         | Dominant and recessive     |

|                              |          |                                                                                                                                        |                                                     |                        |
|------------------------------|----------|----------------------------------------------------------------------------------------------------------------------------------------|-----------------------------------------------------|------------------------|
| <i>RAX2</i> <sup>a,c</sup>   | 19p13.3  | Retina and anterior neural fold homeobox 2 transcription factor                                                                        | Retinitis pigmentosa; cone-rod dystrophy            | Dominant and recessive |
| <i>RBP3</i> <sup>a</sup>     | 10q11.22 | Retinol binding protein 3 (role in retinoid recycling)                                                                                 | Retinal dystrophy associated with high myopia       | Recessive              |
| <i>RDH5</i> <sup>a,b,d</sup> | 14q24.1  | Retinol dehydrogenase 5 (role in retinoid recycling)                                                                                   | Fundus albipunctatus, retinitis pigmentosa          | Recessive              |
| <i>RHO</i> <sup>a</sup>      | 3q22.1   | Rhodopsin (forms visual pigment in rods)                                                                                               | Retinitis pigmentosa                                | Dominant and recessive |
| <i>RLBP1</i> <sup>a</sup>    | 15q26.1  | Retinaldehyde-binding protein 1 (role in retinoid recycling)                                                                           | Bothnia dystrophy, retinitis pigmentosa             | Recessive              |
| <i>RPILI</i> <sup>a</sup>    | 15q26.1  | Retinitis pigmentosa 1-like protein 1 (role in photoreceptor connecting cilia)                                                         | Occult macular dystrophy; retinitis pigmentosa      | Dominant and recessive |
| <i>SAG</i> <sup>a</sup>      | 2q37.1   | S-antigen, arrestin (binds activated rhodopsin to permit shut-off of the light response)                                               | Oguchi disease, retinitis pigmentosa                | Recessive and dominant |
| <i>TULP1</i> <sup>a</sup>    | 6p21.31  | Tubby-like protein 1 (role in rhodopsin transport within photoreceptors)                                                               | Retinitis pigmentosa; Leber congenital amaurosis    | Recessive              |
| <i>CFH</i> <sup>d</sup>      | 1q31.3   | Complement factor H (regulates alternative complement pathway)                                                                         | Early onset macular drusen                          | Dominant               |
| <i>MERTK</i> <sup>d</sup>    | 2q13     | c-mer protooncogene receptor tyrosine kinase (loss of function leads to defective phagocytosis of photoreceptor outer segments by RPE) | Retinitis pigmentosa; early onset retinal dystrophy | Recessive              |

|                                                                                                     |               |                                                                                                                                                        |                                                                                                   |                        |
|-----------------------------------------------------------------------------------------------------|---------------|--------------------------------------------------------------------------------------------------------------------------------------------------------|---------------------------------------------------------------------------------------------------|------------------------|
| <i>ABCA4</i> <sup>e</sup>                                                                           | 1p22.1        | ATP-binding cassette transporter A4<br>(functions as a flippase for N-retinylidene-phosphatidylethanolamine; aids clearing of all-trans retinaldehyde) | Stargardt disease<br>macular dystrophy;<br>cone-rod dystrophy                                     | Recessive              |
| <i>NR2E3</i> <sup>e</sup>                                                                           | 15q23         | Nuclear receptor subfamily 2 group E3<br>(transcription factor, role in rod photoreceptor development; loss of function leads to excess of S-cones)    | Enhanced S-cone syndrome,<br>Goldmann-Faver syndrome,<br>retinitis pigmentosa                     | Recessive and dominant |
| <i>MYO7A</i> <sup>e</sup>                                                                           | 11q13.5       | Myosin VIIA (motor protein functions in transport of opsin in photoreceptors and melanosomes in RPE)                                                   | Type 1 Usher syndrome<br>(retinitis pigmentosa and deafness)                                      | Recessive              |
| <b><i>Genes associated with oculocutaneous albinism (and foveal hypoplasia)</i></b>                 |               |                                                                                                                                                        |                                                                                                   |                        |
| <i>OCA2</i> <sup>a,e</sup>                                                                          | 15q12-15q13.1 | Oculocutaneous albinism 2 melanosomal transmembrane protein (protein regulates pH of melanosomes)                                                      | Oculocutaneous albinism                                                                           | Recessive              |
| <i>TYR</i> <sup>a</sup>                                                                             | 11q14.3       | Tyrosinase (role in melanin synthesis)                                                                                                                 | Oculocutaneous albinism                                                                           | Recessive              |
| <b><i>Genes associated with rare monogenic ocular maldevelopment (including microphthalmia)</i></b> |               |                                                                                                                                                        |                                                                                                   |                        |
| <i>VSX2</i> <sup>a,b</sup>                                                                          | 14q24.3       | Visual system homeobox 2 (role in eye development)                                                                                                     | Microphthalmia                                                                                    | Recessive              |
| <i>PITX2</i> <sup>e</sup>                                                                           | 4q25          | Paired-like homeodomain transcription factor 2 (role in eye development)                                                                               | Anterior segment dysgenesis;<br>microphthalmia                                                    | Dominant               |
| <i>ATOH7</i> <sup>a</sup>                                                                           | 10q21.3       | Atonal basic helix-loop-helix transcription factor 7 (role in eye development)                                                                         | Persistent primary hypoplastic vitreous;<br>ocular maldevelopment,<br>including<br>microphthalmia | Recessive              |

|                          |          |                                                                                                                                |                           |                        |
|--------------------------|----------|--------------------------------------------------------------------------------------------------------------------------------|---------------------------|------------------------|
| <i>CHD7</i> <sup>a</sup> | 8q12.2   | Chromodomain helicase DNA-binding protein 7 (role in control of neurocrest gene expression and in regulation of cell motility) | CHARGE syndrome           | Dominant               |
| <i>RARB</i> <sup>a</sup> | 3p24.2   | Retinoic acid receptor beta (role in eye and other organ development)                                                          | Microphthalmia, syndromic | Dominant and recessive |
| <i>RAX</i> <sup>a</sup>  | 18q21.32 | Retina and anterior neural fold homeobox (role in eye development)                                                             | Microphthalmia            | Recessive              |
