# Supplementary material for: Sub-cellular level resolution of common genetic variation in the photoreceptor layer identifies continuum between rare disease and common variation
Source: PubMed Central journal article supplement (PMC9997913; doi:10.1371/journal.pgen.1010587), 2023-02-27
Supplement: pgen.1010587.s011.pdf [file pgen.1010587.s011.pdf]

| Gene Name     | N   | Chr | Effect Size | P-value  | Layer | Model | Ocular phenotypes                                                                                                                                                 | Non-ocular phenotypes                                                                                                                                                                                     |
|---------------|-----|-----|-------------|----------|-------|-------|-------------------------------------------------------------------------------------------------------------------------------------------------------------------|-----------------------------------------------------------------------------------------------------------------------------------------------------------------------------------------------------------|
| <i>TTK</i>    | 26  | 6   | -0.03       | 1.27E-05 | ONL   | MS    | Macular thickness                                                                                                                                                 | Alcoholism, Basal metabolic rate, Blood pressure, Body mass, Breast cancer, Daytime sleep phenotypes, Erythrocytes, Heel bone mineral density, Height, Lung function, Pancreatic neoplasms                |
| <i>PGM5</i>   | 21  | 9   | -0.03       | 4.91E-05 | ONL   | MS    |                                                                                                                                                                   | Bipolar disorder, Blood pressure, Chronic kidney disease, Creatinine levels, Estimated glomerular filtration rate, Leg mass, Metabolite levels, Urate levels                                              |
| <i>ABCA4</i>  | 197 | 1   | -0.03       | 4.34E-05 | IS    | MS    | AMD, Cone-rod dystrophy, Retinitis pigmentosa, Refractive error, Stargardt disease                                                                                |                                                                                                                                                                                                           |
| <i>PITX2</i>  | 11  | 4   | -0.03       | 4.67E-05 | IS    | MS    | Axenfeld Anomaly, Glaucoma, Peters anomaly, Rieger Anomaly, Ring dermoid of Cornea                                                                                | Acute appendicitis, Arrhythmia, Atrial fibrillation, Hypertension, Ischemic stroke                                                                                                                        |
| <i>NR2E3</i>  | 173 | 15  | 0.03        | 5.42E-06 | IS    | MS    | Abnormality of the eye, Enhanced S-Cone syndrome, Goldmann-Favre syndrome, Macular thickness, Retinitis pigmentosa, Strong/weak meridian, Vertical cup-disc ratio | Adolescent idiopathic scoliosis, Chronic obstructive pulmonary disease, Height, Lung Function, Pulse pressure, Rate of cognitive decline in mild cognitive impairment, Red blood cell count, Urate levels |
| <i>MYO7A</i>  | 350 | 11  | 0.03        | 3.33E-05 | OS    | MS    | Retinal dystrophy, Retinitis pigmentosa, Usher syndrome                                                                                                           | Allergic disease, BMI, Deafness, Educational attainment, Hand grip strength, Height, Platelet traits, Ulcerative colitis                                                                                  |
| <i>OCA2</i>   | 480 | 15  | 0.04        | 2.33E-09 | OS    | MS    | Age-related macular degeneration, Age started wearing glasses, Corneal astigmatism, Eye colour, Macular thickness, Oculocutaneous albinism, Refractive error      | ADHD, Ease of Tanning, Educational attainment, Hair colour, Malignant neoplasm of skin, Skin colour, Sunburn, Vitiligo                                                                                    |
| <i>GDPGP1</i> | 50  | 15  | 0.03        | 2.28E-05 | OS    | MS    | Glaucoma, IOP                                                                                                                                                     | Allergic disease, Eczema, Heel bone mineral density, Height, Male-pattern baldness, Multiple sclerosis, Platelet traits, Type 2 diabetes, White blood cell traits                                         |
| <i>ABCD4</i>  | 15  | 14  | 0.03        | 8.52E-06 | IS    | LoF   | Glaucoma, IOP, Macular thickness, Refractive error, Spherical power                                                                                               | Body mass, Depression, Educational attainment, Height, Lung function, Methylmalonic aciduria and homocystinuria, Neuroticism, Red blood cell traits                                                       |
| <i>CIB3</i>   | 10  | 19  | -0.03       | 2.69E-05 | IS    | LoF   | Myopia                                                                                                                                                            | Heel bone mineral density, Height, Platelet traits, Urinary metabolites, White blood cell traits                                                                                                          |
