# Supplementary material for: Sub-cellular level resolution of common genetic variation in the photoreceptor layer identifies continuum between rare disease and common variation
Source: PubMed Central journal article supplement (PMC9997913; doi:10.1371/journal.pgen.1010587), 2023-02-27
Supplement: pgen.1010587.s012.pdf [file pgen.1010587.s012.pdf]

| Original gene set ID         | Original gene set description                                                                                                                                | Nominal P-value | False discovery rate <5% |
|------------------------------|--------------------------------------------------------------------------------------------------------------------------------------------------------------|-----------------|--------------------------|
| GO:0000978                   | RNA polymerase II core promoter proximal region sequence-specific DNA binding                                                                                | 5.65E-07        | Yes                      |
| KEGG:Circadian Rhythm Mammal | KEGG:Circadian Rhythm Mammal                                                                                                                                 | 8.90E-07        | Yes                      |
| ENSG00000134852              | CLOCK subnetwork                                                                                                                                             | 1.76E-06        | Yes                      |
| MP:0001303                   | abnormal lens morphology                                                                                                                                     | 1.78E-06        | Yes                      |
| GO:0000981                   | sequence-specific DNA binding RNA polymerase II transcription factor activity                                                                                | 3.01E-06        | Yes                      |
| MP:0002840                   | abnormal lens fiber morphology                                                                                                                               | 9.06E-06        | Yes                      |
| MP:0001304                   | cataracts                                                                                                                                                    | 9.17E-06        | Yes                      |
| GO:0051898                   | negative regulation of protein kinase B signaling cascade                                                                                                    | 9.81E-06        | Yes                      |
| ENSG00000151623              | NR3C2 subnetwork                                                                                                                                             | 1.16E-05        | Yes                      |
| ENSG00000162992              | NEUROD1 subnetwork                                                                                                                                           | 1.16E-05        | Yes                      |
| ENSG00000100380              | ST13 subnetwork                                                                                                                                              | 1.28E-05        | Yes                      |
| ENSG00000164442              | CITED2 subnetwork                                                                                                                                            | 1.57E-05        | Yes                      |
| MP:0001299                   | abnormal eye distance/ position                                                                                                                              | 1.63E-05        | Yes                      |
| GO:0000987                   | core promoter proximal region sequence-specific DNA binding                                                                                                  | 1.93E-05        | Yes                      |
| GO:0001159                   | core promoter proximal region DNA binding                                                                                                                    | 2.86E-05        | Yes                      |
| MP:0001328                   | disorganized retinal layers                                                                                                                                  | 2.87E-05        | Yes                      |
| GO:0071478                   | cellular response to radiation                                                                                                                               | 3.01E-05        | Yes                      |
| GO:0000982                   | RNA polymerase II core promoter proximal region sequence-specific DNA binding transcription factor activity                                                  | 3.22E-05        | Yes                      |
| GO:0043401                   | steroid hormone mediated signaling pathway                                                                                                                   | 3.53E-05        | Yes                      |
| ENSG00000031544              | ENSG00000031544 subnetwork                                                                                                                                   | 3.58E-05        | Yes                      |
| ENSG00000160202              | CRYAA subnetwork                                                                                                                                             | 4.02E-05        | Yes                      |
| GO:0034339                   | regulation of transcription from RNA polymerase II promoter by nuclear hormone receptor                                                                      | 4.38E-05        | Yes                      |
| GO:0001077                   | RNA polymerase II core promoter proximal region sequence-specific DNA binding transcription factor activity involved in positive regulation of transcription | 4.97E-05        | Yes                      |

|                                                 |                                                                                                |          |     |
|-------------------------------------------------|------------------------------------------------------------------------------------------------|----------|-----|
| GO:0004879                                      | ligand-activated sequence-specific DNA binding RNA polymerase II transcription factor activity | 5.58E-05 | Yes |
| REACTOME:Nuclear Receptor Transcription Pathway | REACTOME:Nuclear Receptor Transcription Pathway                                                | 5.68E-05 | Yes |
| GO:0003707                                      | steroid hormone receptor activity                                                              | 7.87E-05 | Yes |
| ENSG00000126351                                 | THRA subnetwork                                                                                | 1.00E-04 | Yes |
| GO:0071482                                      | cellular response to light stimulus                                                            | 1.00E-04 | Yes |
| ENSG00000179588                                 | ZFPM1 subnetwork                                                                               | 1.06E-04 | Yes |
| ENSG00000151090                                 | THRB subnetwork                                                                                | 1.08E-04 | Yes |
| MP:0002864                                      | abnormal ocular fundus morphology                                                              | 1.18E-04 | Yes |
| ENSG00000108094                                 | CUL2 subnetwork                                                                                | 1.28E-04 | Yes |
| MP:0001293                                      | anophthalmia                                                                                   | 1.30E-04 | Yes |
| GO:0043491                                      | protein kinase B signaling cascade                                                             | 1.34E-04 | Yes |
| ENSG00000124151                                 | NCOA3 subnetwork                                                                               | 1.35E-04 | Yes |
| GO:0004859                                      | phospholipase inhibitor activity                                                               | 1.42E-04 | Yes |
| MP:0002944                                      | increased lactate dehydrogenase level                                                          | 1.44E-04 | Yes |
| ENSG00000173486                                 | FKBP2 subnetwork                                                                               | 1.53E-04 | Yes |
| GO:0009416                                      | response to light stimulus                                                                     | 1.57E-04 | Yes |
| ENSG00000116016                                 | EPAS1 subnetwork                                                                               | 1.63E-04 | Yes |
| MP:0004362                                      | cochlear hair cell degeneration                                                                | 1.63E-04 | Yes |
| ENSG00000206289                                 | RXRB subnetwork                                                                                | 1.64E-04 | Yes |
| ENSG00000206218                                 | ENSG00000206218 subnetwork                                                                     | 1.64E-04 | Yes |
| ENSG00000204231                                 | RXRB subnetwork                                                                                | 1.64E-04 | Yes |
| GO:0043010                                      | camera-type eye development                                                                    | 1.78E-04 | Yes |
| MP:0001382                                      | abnormal nursing                                                                               | 1.90E-04 | Yes |
| MP:0000784                                      | forebrain hypoplasia                                                                           | 2.14E-04 | Yes |
| ENSG00000004059                                 | ARF5 subnetwork                                                                                | 2.20E-04 | Yes |
| GO:0000976                                      | transcription regulatory region sequence-specific DNA binding                                  | 2.23E-04 | Yes |
| MP:0009434                                      | paraparesis                                                                                    | 2.25E-04 | Yes |
| ENSG00000139323                                 | POC1B subnetwork                                                                               | 2.26E-04 | Yes |
| GO:0009314                                      | response to radiation                                                                          | 2.33E-04 | Yes |
| GO:0030032                                      | lamellipodium assembly                                                                         | 2.42E-04 | Yes |
| MP:0008511                                      | thin retinal inner nuclear layer                                                               | 2.53E-04 | Yes |
| GO:0055102                                      | lipase inhibitor activity                                                                      | 2.83E-04 | Yes |
| GO:0001654                                      | eye development                                                                                | 2.90E-04 | Yes |
| GO:0005212                                      | structural constituent of eye lens                                                             | 2.96E-04 | Yes |
| GO:0007030                                      | Golgi organization                                                                             | 3.11E-04 | Yes |

|                 |                                                                                                                                                                       |          |     |
|-----------------|-----------------------------------------------------------------------------------------------------------------------------------------------------------------------|----------|-----|
| GO:0001078      | RNA polymerase II core promoter proximal region<br>sequence-specific DNA binding<br>transcription factor activity involved in<br>negative regulation of transcription | 3.16E-04 | Yes |
| MP:0005253      | abnormal eye physiology                                                                                                                                               | 3.26E-04 | Yes |
| ENSG00000132780 | NASP subnetwork                                                                                                                                                       | 3.40E-04 | Yes |
| ENSG00000121671 | CRY2 subnetwork                                                                                                                                                       | 3.43E-04 | Yes |
| ENSG00000173991 | TCAP subnetwork                                                                                                                                                       | 3.47E-04 | Yes |
| MP:0005591      | decreased vasodilation                                                                                                                                                | 3.47E-04 | Yes |
| GO:0030275      | LRR domain binding                                                                                                                                                    | 3.53E-04 | Yes |
| GO:0009755      | hormone-mediated signaling pathway                                                                                                                                    | 3.54E-04 | Yes |
| GO:0000977      | RNA polymerase II regulatory region sequence-specific<br>DNA binding                                                                                                  | 3.71E-04 | Yes |
| ENSG00000113312 | TTC1 subnetwork                                                                                                                                                       | 3.90E-04 | Yes |
| ENSG00000184357 | HIST1H1B subnetwork                                                                                                                                                   | 4.07E-04 | Yes |
| MP:0002280      | abnormal intercostal muscle morphology                                                                                                                                | 4.14E-04 | Yes |
