# Supplementary material for: Sub-cellular level resolution of common genetic variation in the photoreceptor layer identifies continuum between rare disease and common variation
Source: PubMed Central journal article supplement (PMC9997913; doi:10.1371/journal.pgen.1010587), 2023-02-27
Supplement: pgen.1010587.s013.pdf [file pgen.1010587.s013.pdf]

| <b>MeSH term</b> | <b>MeSH first level term</b> | <b>MeSH second level term</b> | <b>Nominal P value</b> | <b>False discovery rate &lt;5%</b> |
|------------------|------------------------------|-------------------------------|------------------------|------------------------------------|
| A11.436          | Epithelial Cells             | Cells                         | 1.17E-04               | Yes                                |
| A09.371          | Eye                          | Sense Organs                  | 8.02E-04               | Yes                                |
| A09.371.729      | Retina                       | Sense Organs                  | 1.64E-03               | Yes                                |
| A10.615          | Membranes                    | Tissues                       | 4.41E-03               | No                                 |
| A10.615.550      | Mucous Membrane              | Tissues                       | 0.01                   | No                                 |
| A10.615.550.599  | Mouth Mucosa                 | Tissues                       | 0.02                   | No                                 |
| A03.734.414      | Islets of Langerhans         | Digestive System              | 0.03                   | No                                 |
| A14.549          | Mouth                        | Stomatognathic System         | 0.04                   | No                                 |
| A10.272          | Epithelium                   | Tissues                       | 0.04                   | No                                 |
| A10.615.550.760  | Respiratory Mucosa           | Tissues                       | 0.05                   | No                                 |
| A04.531.520      | Nasal Mucosa                 | Respiratory System            | 0.05                   | No                                 |
| A09.531          | Nose                         | Sense Organs                  | 0.05                   | No                                 |
