# Supplementary material for: Sub-cellular level resolution of common genetic variation in the photoreceptor layer identifies continuum between rare disease and common variation
Source: PubMed Central journal article supplement (PMC9997913; doi:10.1371/journal.pgen.1010587), 2023-02-27
Supplement: pgen.1010587.s014.pdf [file pgen.1010587.s014.pdf]

| SNP        | Chr | F1 | F2 | F1 effect size | F2 effect size | P-value  | Associated gene   | Ocular phenotypes                        | General phenotypes                                                                                                                                                                                                                                                                                                    |
|------------|-----|----|----|----------------|----------------|----------|-------------------|------------------------------------------|-----------------------------------------------------------------------------------------------------------------------------------------------------------------------------------------------------------------------------------------------------------------------------------------------------------------------|
| rs11708067 | 3   | F  | I  | 0.69           | 0.10           | 1.00E-07 | <i>ADCY5</i>      | Refractive error                         | Birth length, Birth weight, Cholesterol levels, Chronotype, Chronic kidney disease, Fasting blood glucose, Forced expiratory volume, Heel bone mineral density, Height, Type 2 diabetes                                                                                                                               |
| rs75757892 | 6   | F  | I  | -1.12          | -0.55          | 3.75E-06 | <i>RREB1</i>      | AMD, Cup-to-disc ratio, Refractive error | Birth weight, Blood glucose levels, Chronic kidney disease, Heel bone mineral density, Height, Hematocrit, Hemoglobin concentration, Impedance of body, Microcephaly, Mouth ulcers, Multiple sclerosis, Parkinsons, Red blood cell count, Self-reported math ability, Stroke, Type 2 diabetes, White blood cell count |
| rs45569432 | 14  | F  | I  | -1.35          | -2.17          | 3.27E-08 | <i>VSX2</i>       | Macular thickness, Refractive error      | Cancer of endocrine glands, Chronotype, Red blood cell traits                                                                                                                                                                                                                                                         |
| rs1769287  | 1   | F  | P  | -0.59          | -0.05          | 6.90E-08 | <i>SLC1A7</i>     |                                          | Amyotrophic lateral sclerosis, Duration of fitness test, Height, Hippocampal atrophy, Lupus                                                                                                                                                                                                                           |
| rs6701735  | 1   | F  | P  | 0.67           | -0.07          | 5.14E-07 | <i>MIR29B2CHG</i> |                                          | Pulse rate, White blood cell count                                                                                                                                                                                                                                                                                    |
| rs11125573 | 2   | F  | P  | 0.54           | 0.08           | 2.27E-06 | <i>CCDC88A</i>    |                                          | Appendicular lean mass                                                                                                                                                                                                                                                                                                |

|                  |   |   |   |       |       |          |              |                                          |                                                                                                                                                                                                                                                                                                                       |
|------------------|---|---|---|-------|-------|----------|--------------|------------------------------------------|-----------------------------------------------------------------------------------------------------------------------------------------------------------------------------------------------------------------------------------------------------------------------------------------------------------------------|
| rs11720108       | 3 | F | P | 0.71  | -0.04 | 9.67E-13 | <i>ADCY5</i> | Refractive error                         | Birth weight, Chronic kidney disease, Chronotype, Forced expiratory volume, Heel bone mineral density, Sex hormone-binding globulin levels, Statin medication, Type 2 diabetes                                                                                                                                        |
| rs55914544       | 5 | F | P | 0.65  | -0.04 | 2.53E-08 | <i>WWCI</i>  |                                          | Blood pressure, BMI, Body fat, Cerebellum cortex volume, Epithelial ovarian cancer                                                                                                                                                                                                                                    |
| rs75757892       | 6 | F | P | -1.12 | -0.20 | 1.84E-15 | <i>RREB1</i> | AMD, Cup-to-disc ratio, Refractive error | Birth weight, Blood glucose levels, Chronic kidney disease, Heel bone mineral density, Height, Hematocrit, Hemoglobin concentration, Impedance of body, Microcephaly, Mouth ulcers, Multiple sclerosis, Parkinsons, Red blood cell count, Self-reported math ability, Stroke, Type 2 diabetes, White blood cell count |
| 6:150016812_GA_G | 6 | F | P | 0.61  | 0.13  | 1.54E-06 |              |                                          |                                                                                                                                                                                                                                                                                                                       |
| rs746173658      | 8 | F | P | 0.22  | 0.93  | 4.85E-12 |              |                                          |                                                                                                                                                                                                                                                                                                                       |
| rs1337805        | 9 | F | P | -0.52 | 0.06  | 2.07E-07 | <i>PTPRD</i> | Myopia                                   | ADHD, Anxiety, Asthma, Blood pressure, Cancer, Cholesterol, Coronary disease, Depression, Diabetes, Epilepsy, Forced expiratory volume, Heel bone mineral density, Height, Menarche                                                                                                                                   |

|            |    |   |   |       |       |          |                  |                                                                                                                                                                                                                            |                                                                                                                |
|------------|----|---|---|-------|-------|----------|------------------|----------------------------------------------------------------------------------------------------------------------------------------------------------------------------------------------------------------------------|----------------------------------------------------------------------------------------------------------------|
| rs11594394 | 10 | F | P | 0.61  | 0.04  | 1.45E-08 | <i>FRMPD2</i>    | Age started wearing glasses, Myopia, Refractive error, Spherical power                                                                                                                                                     |                                                                                                                |
| rs12225226 | 11 | F | P | 0.20  | -0.45 | 2.33E-07 | <i>LINC01488</i> |                                                                                                                                                                                                                            | BMI, Breast cancer, Cardiomyopathy, Height, Monocyte count, White blood cell count                             |
| rs3138142  | 12 | F | P | 1.37  | 0.81  | 1.03E-07 | <i>RDH5</i>      | Age started wearing glasses, Cataract, Early AMD, Fundus albipunctatus, Hypermetropia, Macular thickness, Myopia, Pigmentary retinal dystrophy, Refractive error, Retinal dystrophy, Retinitis pigmentosa, Spherical power |                                                                                                                |
| rs3921811  | 12 | F | P | 0.57  | -0.02 | 7.37E-10 | <i>PLEKHA5</i>   |                                                                                                                                                                                                                            | Time spent outdoors in winter                                                                                  |
| rs1493529  | 13 | F | P | -0.48 | 0.07  | 1.05E-08 | <i>ENOX1</i>     |                                                                                                                                                                                                                            | Arteries, Blood pressure, Depression, End-stage coagulation, Glucose, Mental health disorders, Prostate tumour |
| rs1972565  | 14 | F | P | 1.27  | 1.94  | 8.59E-09 | <i>VSX2</i>      | Macular thickness, Refractive error                                                                                                                                                                                        | Blood pressure, Chronotype, Coronary artery disease                                                            |

|           |    |   |   |      |      |          |             |                                                                                                                                                                                                                            |
|-----------|----|---|---|------|------|----------|-------------|----------------------------------------------------------------------------------------------------------------------------------------------------------------------------------------------------------------------------|
| rs3138142 | 12 | I | P | 1.28 | 0.81 | 1.31E-07 | <i>RDH5</i> | Age started wearing glasses, Cataract, Early AMD, Fundus albipunctatus, Hypermetropia, Macular thickness, Myopia, Pigmentary retinal dystrophy, Refractive error, Retinal dystrophy, Retinitis pigmentosa, Spherical power |
|-----------|----|---|---|------|------|----------|-------------|----------------------------------------------------------------------------------------------------------------------------------------------------------------------------------------------------------------------------|
