# Supplementary material for: Sub-cellular level resolution of common genetic variation in the photoreceptor layer identifies continuum between rare disease and common variation
Source: PubMed Central journal article supplement (PMC9997913; doi:10.1371/journal.pgen.1010587), 2023-02-27
Supplement: pgen.1010587.s015.pdf [file pgen.1010587.s015.pdf]

| SNP                | Chr | F1 | F2 | F1 effect size | F2 effect size | P value  | Associated gene | Ocular phenotypes                                          | General phenotypes                                                                                             |
|--------------------|-----|----|----|----------------|----------------|----------|-----------------|------------------------------------------------------------|----------------------------------------------------------------------------------------------------------------|
| rs4721061          | 7   | F  | I  | -0.23          | -0.09          | 3.40E-11 | <i>TMEM106B</i> |                                                            | Coronary artery disease, Dementia, Depression, Height, Irritability, Mood swings, Neuroticism                  |
| rs55798570         | 10  | F  | I  | 0.13           | 1.61E-03       | 2.06E-06 | <i>CDHR1</i>    | Cone-rod dystrophy, Refractive error, Retinitis pigmentosa |                                                                                                                |
| rs61773269         | 1   | F  | P  | -0.23          | -0.03          | 1.43E-06 | <i>LRRC8D</i>   |                                                            |                                                                                                                |
| rs7430585          | 3   | F  | P  | -0.26          | -0.05          | 1.27E-18 | <i>TSC22D2</i>  | Age started wearing glasses                                | Blood pressure, Brain morphology, Cholesterol, Platelet count, Pulse pressure, Type 2 diabetes                 |
| rs59515506         | 4   | F  | P  | -0.34          | -0.01          | 7.15E-09 | <i>RUFY3</i>    |                                                            | Cardiovascular disease, Hippocampus, Parkinson disease                                                         |
| rs4131080          | 5   | F  | P  | -0.12          | -0.02          | 1.95E-06 | <i>HNRNP1</i>   |                                                            | Neutrophil count, White blood cell count                                                                       |
| 5:71646122_AATTT_A | 5   | F  | P  | -0.03          | 0.08           | 4.20E-07 |                 |                                                            |                                                                                                                |
| 6:31806799_CA_C    | 6   | F  | P  | -0.13          | 0.01           | 3.33E-08 |                 |                                                            |                                                                                                                |
| rs13237518         | 7   | F  | P  | -0.23          | -0.02          | 1.77E-26 | <i>TMEM106B</i> |                                                            | Coronary artery disease, Dementia, Depression, Height, Irritability, Mood swings, Neuroticism, Type 2 diabetes |

|             |    |   |   |       |       |          |                |                                                               |                                                                                                                                                                     |
|-------------|----|---|---|-------|-------|----------|----------------|---------------------------------------------------------------|---------------------------------------------------------------------------------------------------------------------------------------------------------------------|
| rs141629142 | 9  | F | P | 0.40  | 0.06  | 9.15E-06 | <i>RORB</i>    | Advanced AMD, Macular thickness, Myopia, Refractive error     | Alcohol consumption, Blood pressure, BMI, Cholesterol, Chronotype, Creatinine, Epilepsy, Erythrocytes, Glomerular filtration rate, Glucose, Heart failure, Height   |
| rs1409396   | 10 | F | P | 0.13  | 0.02  | 7.63E-09 | <i>PIP4K2A</i> |                                                               | Frequency of walking for pleasure, Height, Platelet distribution width                                                                                              |
| rs55798570  | 10 | F | P | 0.13  | -0.06 | 1.12E-13 | <i>CDHR1</i>   | Cone-rod dystrophy, Refractive error, Retinitis pigmentosa    |                                                                                                                                                                     |
| rs200916002 | 14 | F | P | -0.07 | -0.21 | 1.46E-06 | <i>BBOF1</i>   |                                                               |                                                                                                                                                                     |
| rs55634267  | 17 | F | P | 0.20  | 0.05  | 1.08E-11 | <i>GNGT2</i>   | Refractive error, Spherical power                             | Angina, Asthma, Chronic lower respiratory disease, Coronary artery disease, Eosinophil counts, Hypertension, Impedance of limbs, Metabolite errors, Prostate cancer |
| rs850526    | 17 | F | P | -0.16 | -0.04 | 7.56E-08 | <i>GNGT2</i>   | Spherical power, Refractive error                             | Appendicular lean mass, Asthma, Chronic lower respiratory disease, Metabolite levels, Primary sclerosing cholangitis, Prostate cancer                               |
| rs76076446  | 19 | F | P | 0.31  | -0.09 | 1.76E-09 | <i>RAX2</i>    | AMD, Cone-rod dystrophy, Macular thickness, Retinal dystrophy |                                                                                                                                                                     |

|                  |    |   |   |       |       |          |                 |                                                                                             |                                                                                                                                                   |
|------------------|----|---|---|-------|-------|----------|-----------------|---------------------------------------------------------------------------------------------|---------------------------------------------------------------------------------------------------------------------------------------------------|
| rs2236665        | 21 | F | P | 0.16  | 0.01  | 1.53E-13 | <i>RRP1B</i>    | Refractive error,<br>Spherical power                                                        | Blood pressure,<br>Coronary artery<br>disease, Haemoglobin<br>traits, High blood<br>pressure, Hypertension,<br>Red blood cell traits              |
| rs1041451        | 21 | F | P | -0.14 | -0.01 | 2.74E-10 | <i>C2CD2</i>    |                                                                                             |                                                                                                                                                   |
| rs6414375        | 3  | I | P | -0.18 | -0.06 | 9.14E-10 | <i>TSC22D2</i>  | Age started wearing<br>glasses, Glaucoma,<br>IOP, Macular<br>thickness, Refractive<br>error | Blood pressure, Brain<br>morphology, Cholesterol,<br>Platelet count, Pulse<br>pressure, Type 2<br>diabetes                                        |
| rs13171669       | 5  | I | P | -0.01 | 0.07  | 3.06E-06 | <i>AFAP1L1</i>  | Macular thickness                                                                           | Blood pressure, BMI,<br>Forced expiratory<br>volume, Glomerular<br>filtration, Hearing<br>difficulties,<br>Hypertension,<br>Socioeconomic factors |
| rs11974335       | 7  | I | P | -0.09 | -0.01 | 1.15E-05 | <i>TMEM106B</i> |                                                                                             | Dementia, Depression,<br>Height, Impedance of<br>body, Irritability, Mood<br>swings, Neuroticism                                                  |
| 21:45115055_CT_C | 21 | I | P | 0.11  | 0.01  | 8.27E-08 |                 |                                                                                             |                                                                                                                                                   |
