# Supplementary material for: Sub-cellular level resolution of common genetic variation in the photoreceptor layer identifies continuum between rare disease and common variation
Source: PubMed Central journal article supplement (PMC9997913; doi:10.1371/journal.pgen.1010587), 2023-02-27
Supplement: pgen.1010587.s016.pdf [file pgen.1010587.s016.pdf]

| SNP         | Chr | F1 | F2 | F1 effect size | F2 effect size | P value  | Associated gene | Ocular phenotypes                                                                                                                                       | General phenotypes                                                                                                                                                                                 |
|-------------|-----|----|----|----------------|----------------|----------|-----------------|---------------------------------------------------------------------------------------------------------------------------------------------------------|----------------------------------------------------------------------------------------------------------------------------------------------------------------------------------------------------|
| rs1329428   | 1   | F  | P  | 0.64           | 0.24           | 4.79E-13 | <i>CFH</i>      | Advanced AMD, Chronic central serous retinopathy, Disorders of the choroid and retina                                                                   | Lung function                                                                                                                                                                                      |
| rs200857348 | 2   | F  | P  | 1.45           | 0.60           | 3.96E-10 | <i>MREG</i>     | Macular thickness                                                                                                                                       | Albuminuria, Breast neoplasms, Coronary artery disease, Heart failure, Socioeconomic factors                                                                                                       |
| rs869016    | 2   | F  | P  | -0.31          | 0.02           | 3.57E-09 | <i>MERTK</i>    | Retinitis pigmentosa                                                                                                                                    | Blood pressure, Coronary artery disease, Heel bone mineral density, Multiple sclerosis                                                                                                             |
| rs556679    | 6   | F  | P  | 0.56           | 0.18           | 8.11E-06 | <i>C2</i>       | AMD, Diabetic retinopathy, Other retinal disorders                                                                                                      | Ankle spacing width, Asthma, Autoimmune disease, Body fat, Coeliac disease, Coffee consumption, Glomerular filtration rate, Membranous nephropathy, Multiple sclerosis, Psoriasis, Type 1 diabetes |
| rs199637836 | 10  | F  | P  | -0.76          | -0.24          | 1.38E-14 |                 |                                                                                                                                                         |                                                                                                                                                                                                    |
| rs3138141   | 12  | F  | P  | 0.76           | 0.32           | 4.48E-13 | <i>RDH5</i>     | Advanced AMD, Age started wearing glasses, Cataract, Fundus albipunctatus, Hypermetropia, Macular thickness, Myopia, Retinal dystrophy, Spherical power | Atrial fibrillation                                                                                                                                                                                |
| rs62125245  | 19  | F  | P  | 0.44           | 0.11           | 7.07E-06 | <i>NXNLI</i>    |                                                                                                                                                         |                                                                                                                                                                                                    |
| rs3138142   | 12  | I  | P  | 0.78           | 0.32           | 3.08E-17 | <i>RDH5</i>     | Advanced AMD, Age started wearing glasses, Cataract, Fundus albipunctatus, Hypermetropia, Macular thickness, Myopia, Retinal dystrophy, Spherical power | Atrial fibrillation                                                                                                                                                                                |
